# Supplementary material
Source: publisher figshare collection journal article supplement (https://acs.figshare.com/ndownloader/files/4275564)
Supplement: Supplementary file 1 [file 4275564]

# Supporting Information for

## Syntheses of Dumbbell-shaped Trifluoropropyl-Substituted POSS Derivatives Linked by Simple Aliphatic Chains, and Their Optical Transparent Thermoplastic Films.

*Hitoshi Araki and Kensuke Naka\**

Department of Chemistry and Materials Technology, Graduate School of Science and Technology,  
Kyoto Institute of Technology, Gohokaido-cho, Matsugasaki, Sakyo-ku, Kyoto 606-8585, Japan

### **Table of contents**

**Figure S1.**  $^1\text{H}$ -NMR of POSS-DE, POSS-DP and POSS-DH after reprecipitation as first purification.

**Figure S2.** GPC traces of the THF solutions of (a) POSS-DE, (b) POSS-DP and (c) POSS-DH after 2 h and 2 days incubation at r.t.

**Figure S3.**  $^{13}\text{C}$ -NMR of POSS-F7A1.

**Figure S4.**  $^{13}\text{C}$ -NMR of POSS-DE.

**Figure S5.**  $^{13}\text{C}$ -NMR of POSS-DP.

**Figure S6.**  $^{13}\text{C}$ -NMR of POSS-DH.

**Figure S7.**  $^{29}\text{Si}$ -NMR of POSS-F7A1.

**Figure S8.**  $^{29}\text{Si}$ -NMR of POSS-DE.

**Figure S9.**  $^{29}\text{Si}$ -NMR of POSS-DP.

**Figure S10.**  $^{29}\text{Si}$ -NMR of POSS-DH.

**Figure S11.** A SEM image of the surface of the opaque whitish film prepared from POSS-DE.

**Figure S12.** DSC traces of POSS-DE as shown in Figure 5 and the film obtained from POSS-DE.

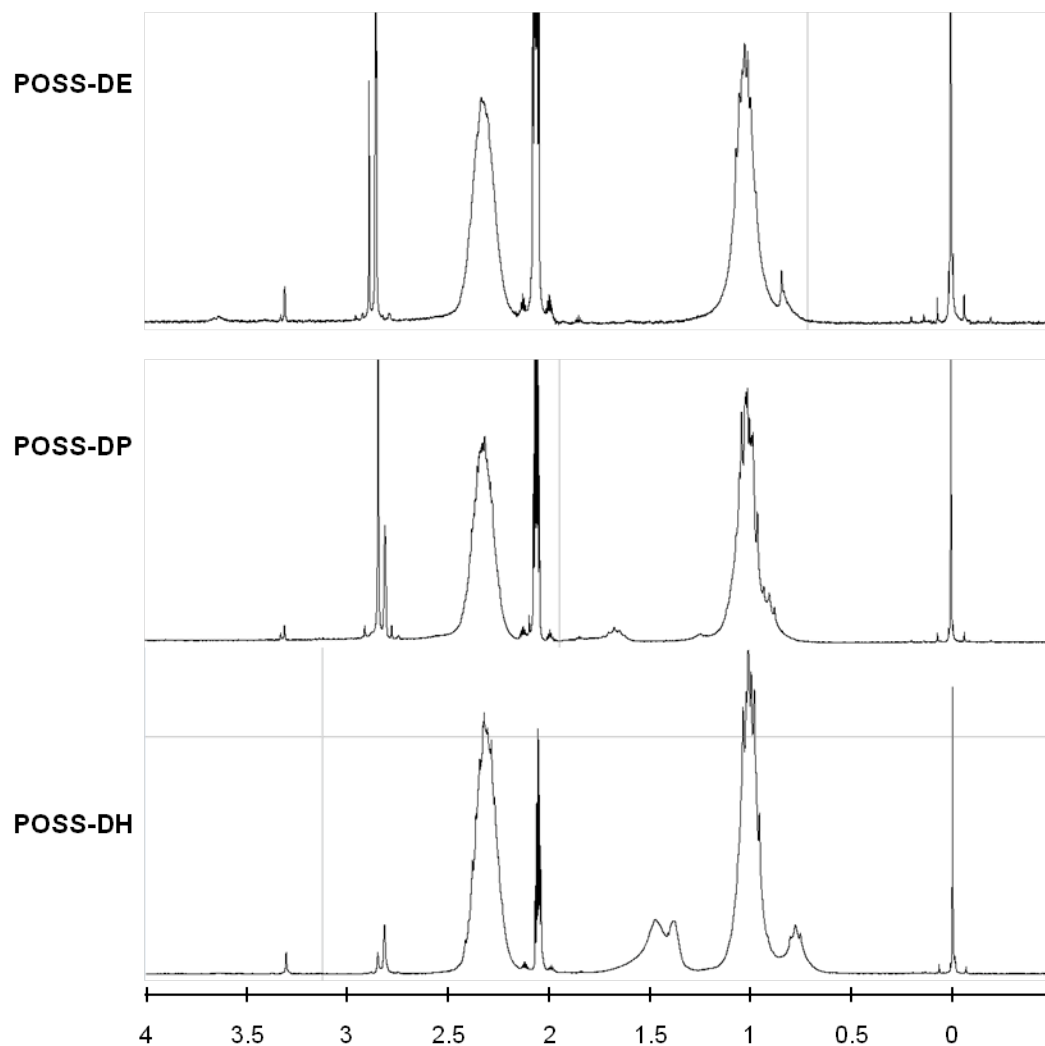

**Figure S1.**  $^1\text{H}$ -NMR of POSS-DE, POSS-DP and POSS-DH after reprecipitation as first purification.

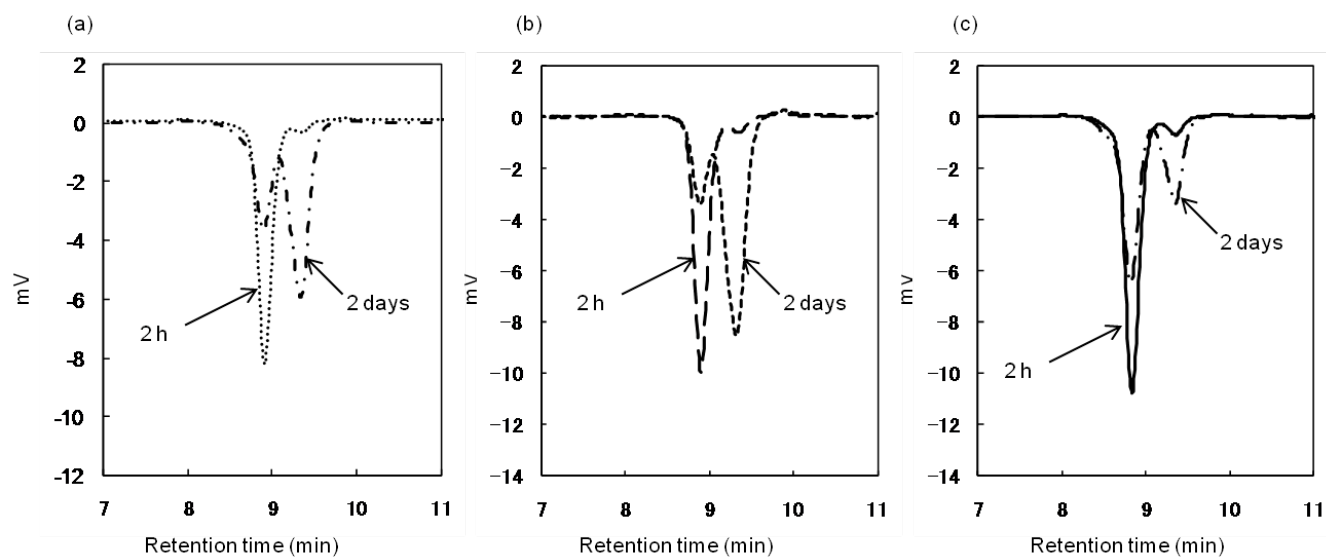

**Figure S2.** GPC traces of the THF solutions of (a) POSS-DE, (b) POSS-DP and (c) POSS-DH after 2 h and 2 days incubation at r.t.

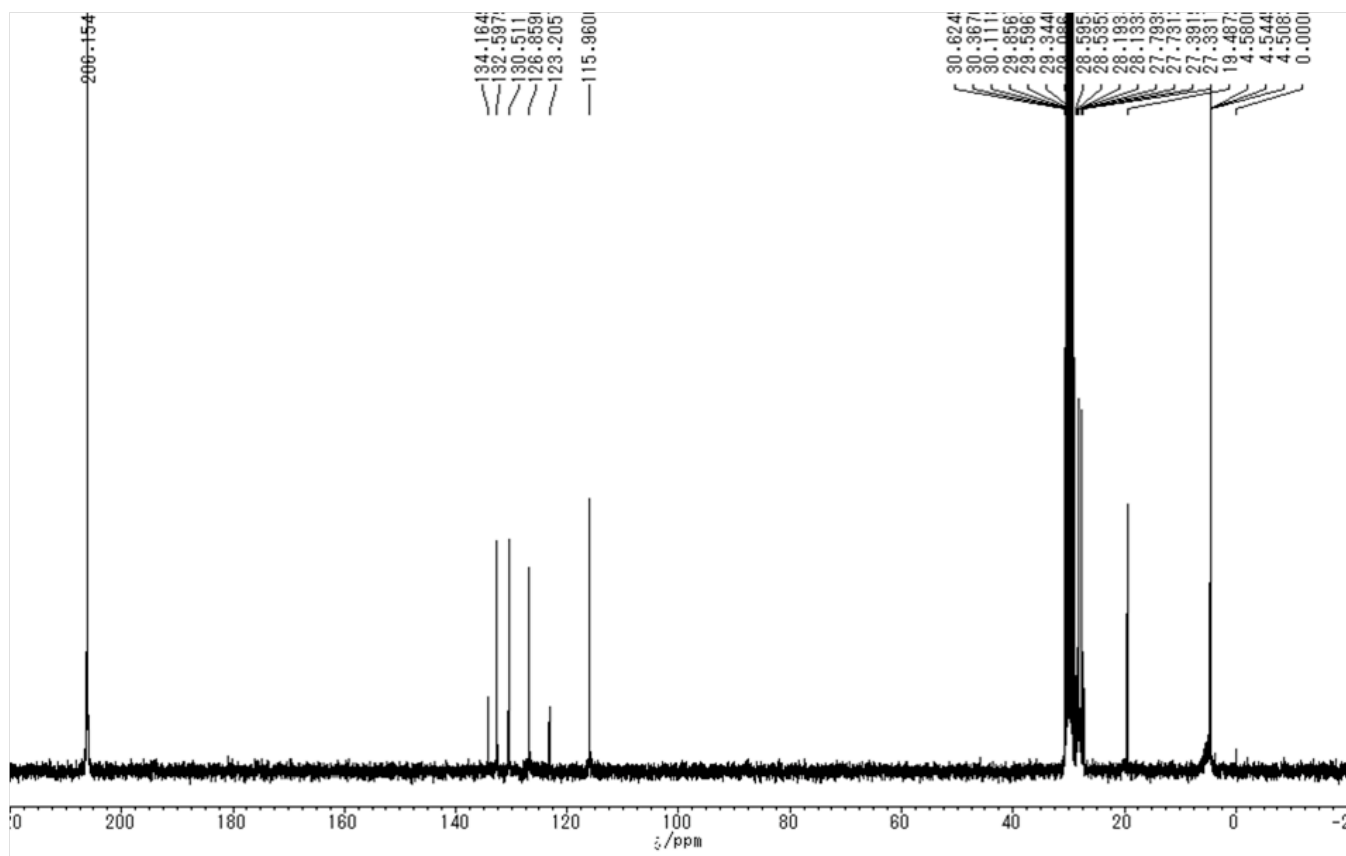

**Figure S3.**  $^{13}\text{C}$ -NMR of POSS-F7A1.

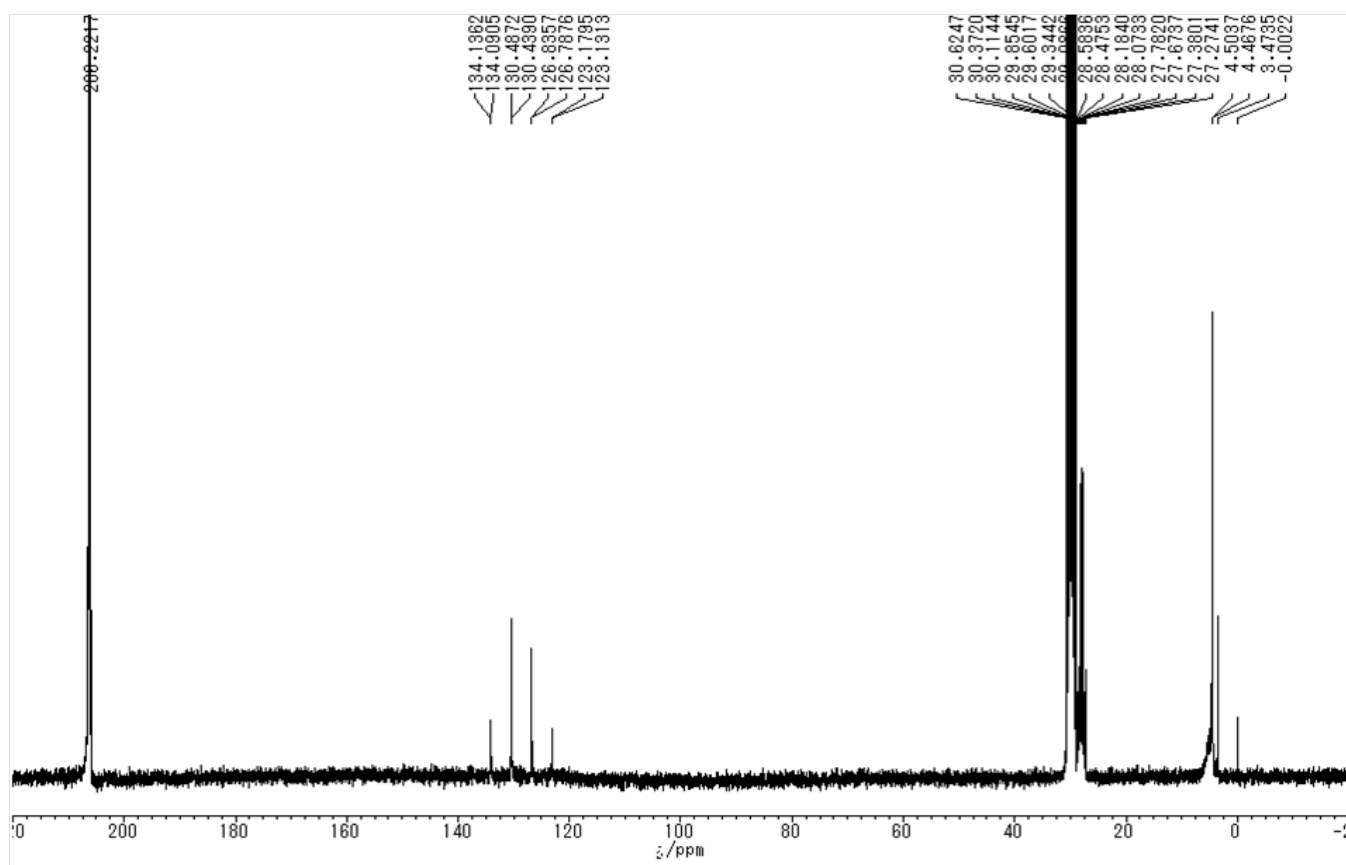

**Figure S4.**  $^{13}\text{C}$ -NMR of POSS-DE.

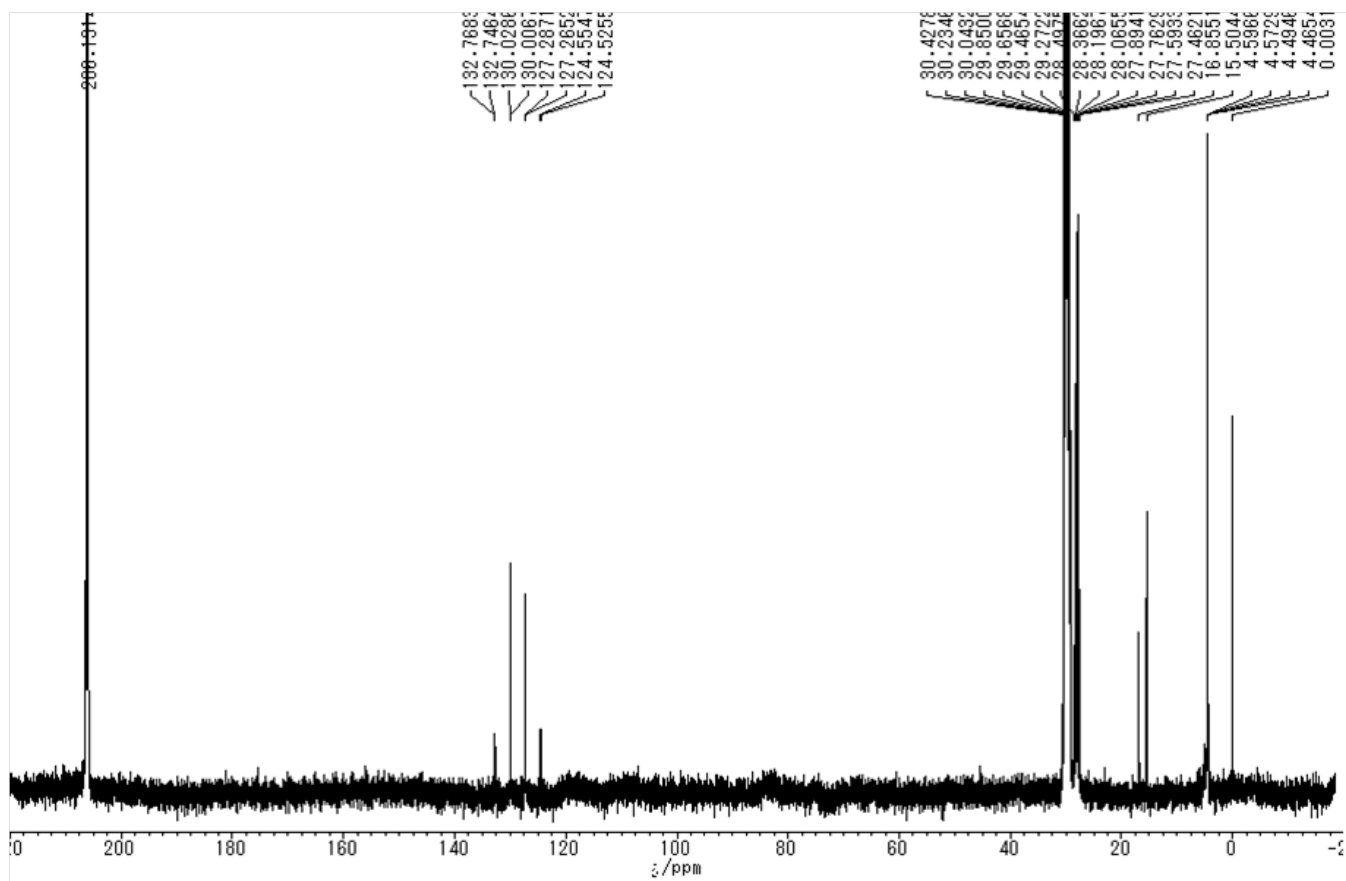

**Figure S5.** <sup>13</sup>C-NMR of POSS-DP.

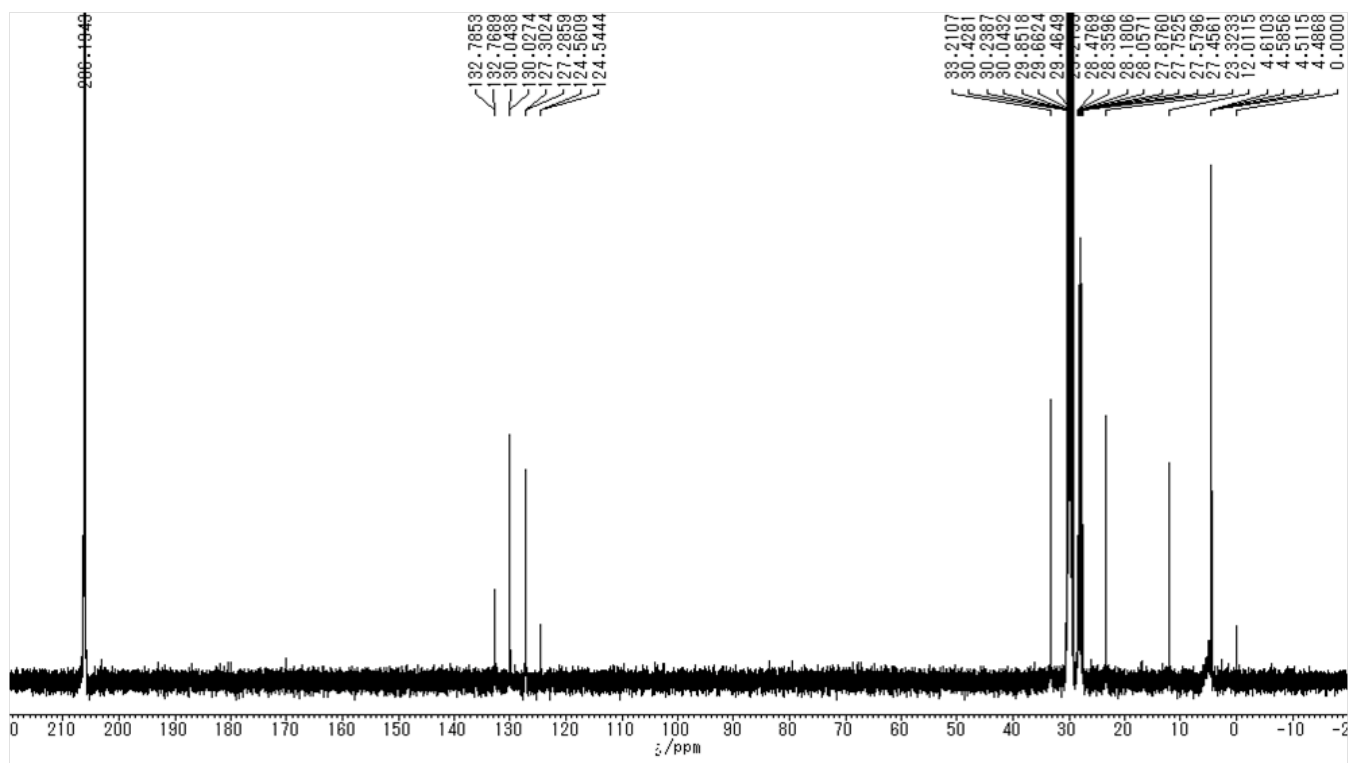

**Figure S6.** <sup>13</sup>C-NMR of POSS-DH.

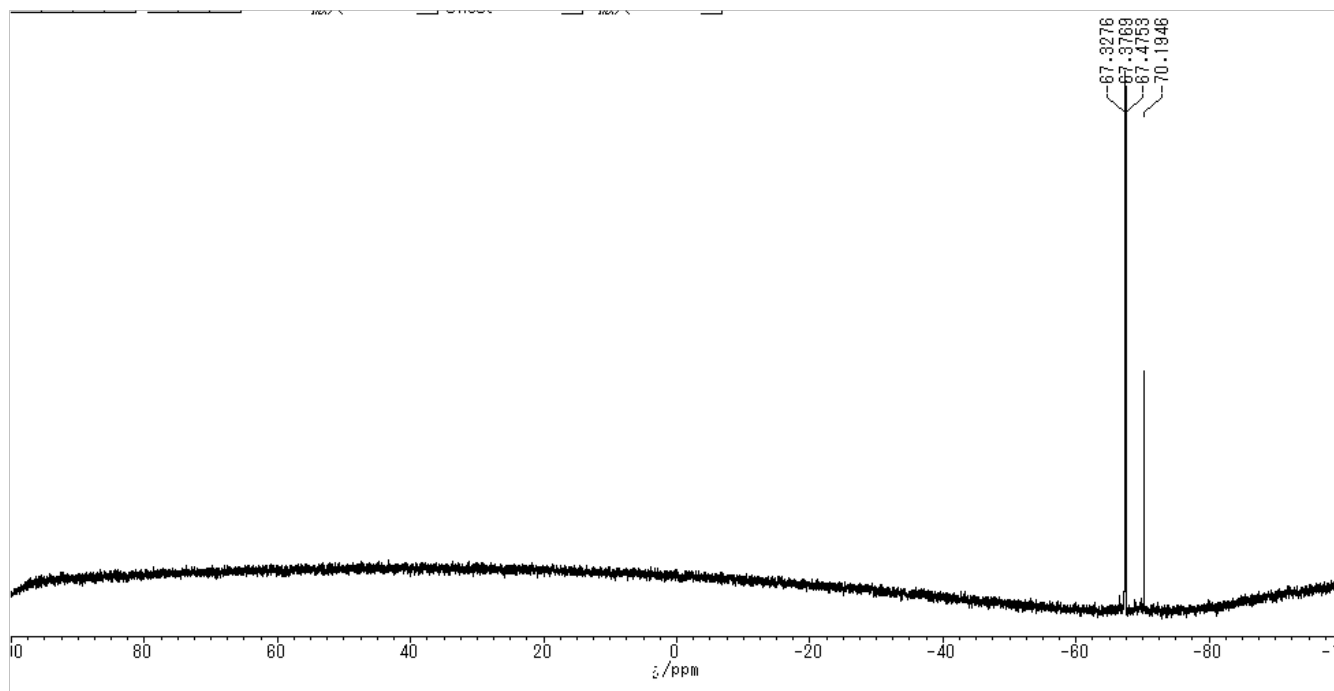

**Figure S7.**  $^{29}\text{Si}$ -NMR of POSS-F7A1.

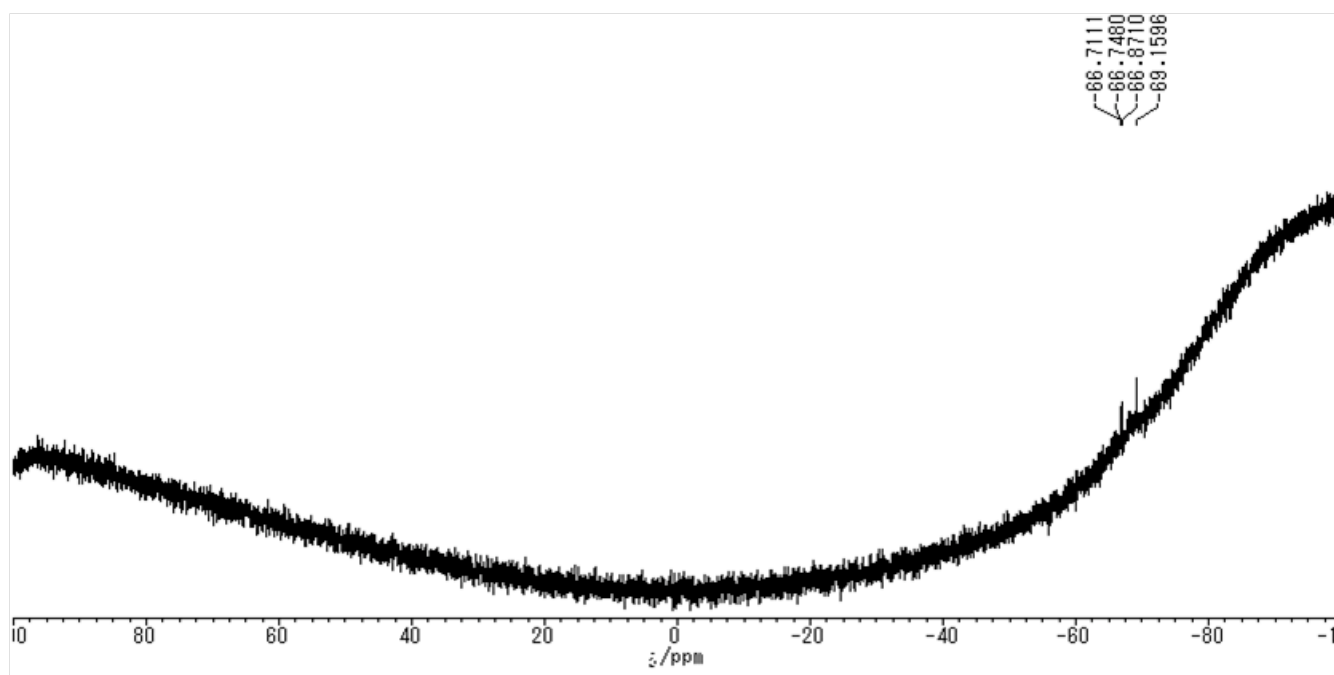

**Figure S8.**  $^{29}\text{Si}$ -NMR of POSS-DE.

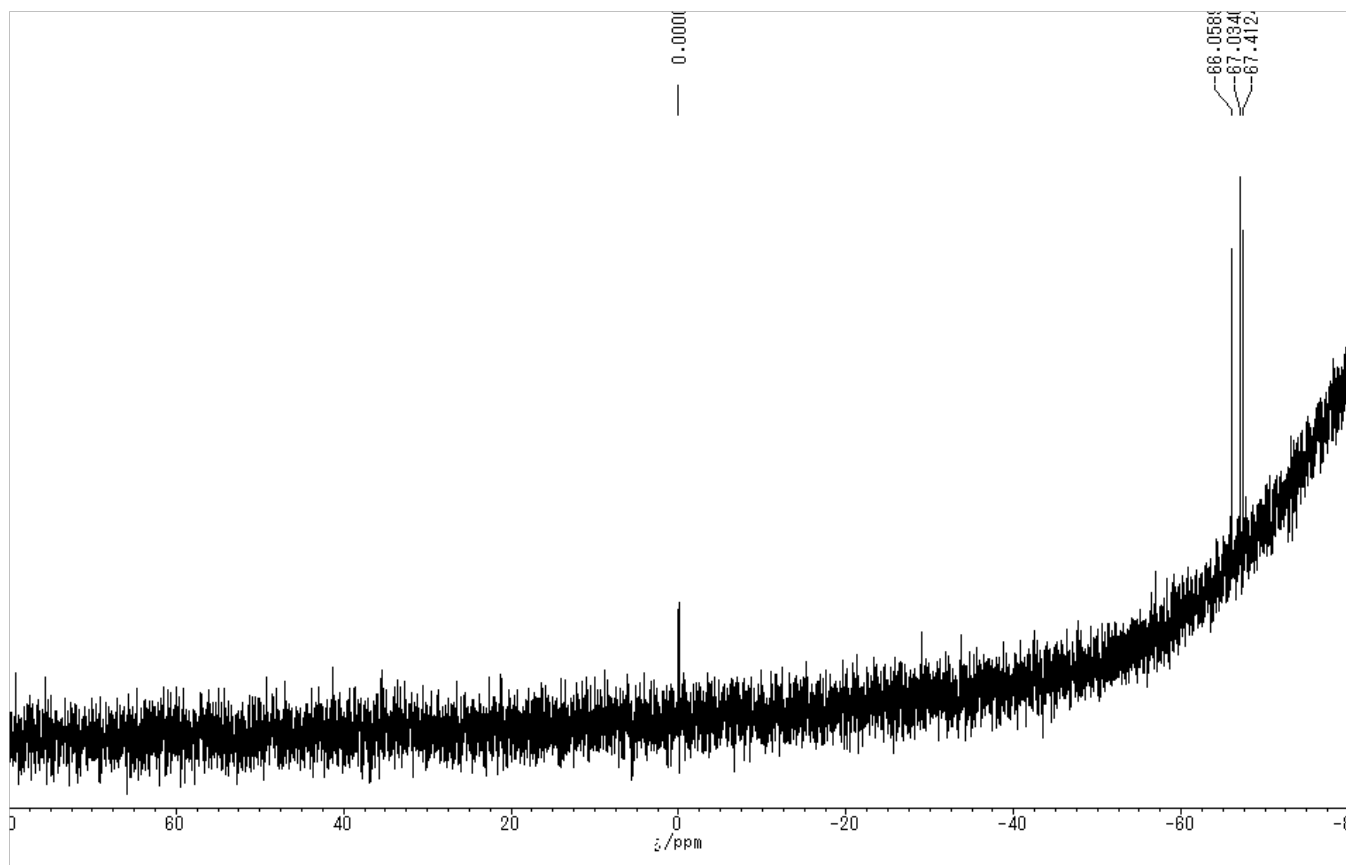

**Figure S9.**  $^{29}\text{Si}$ -NMR of POSS-DP.

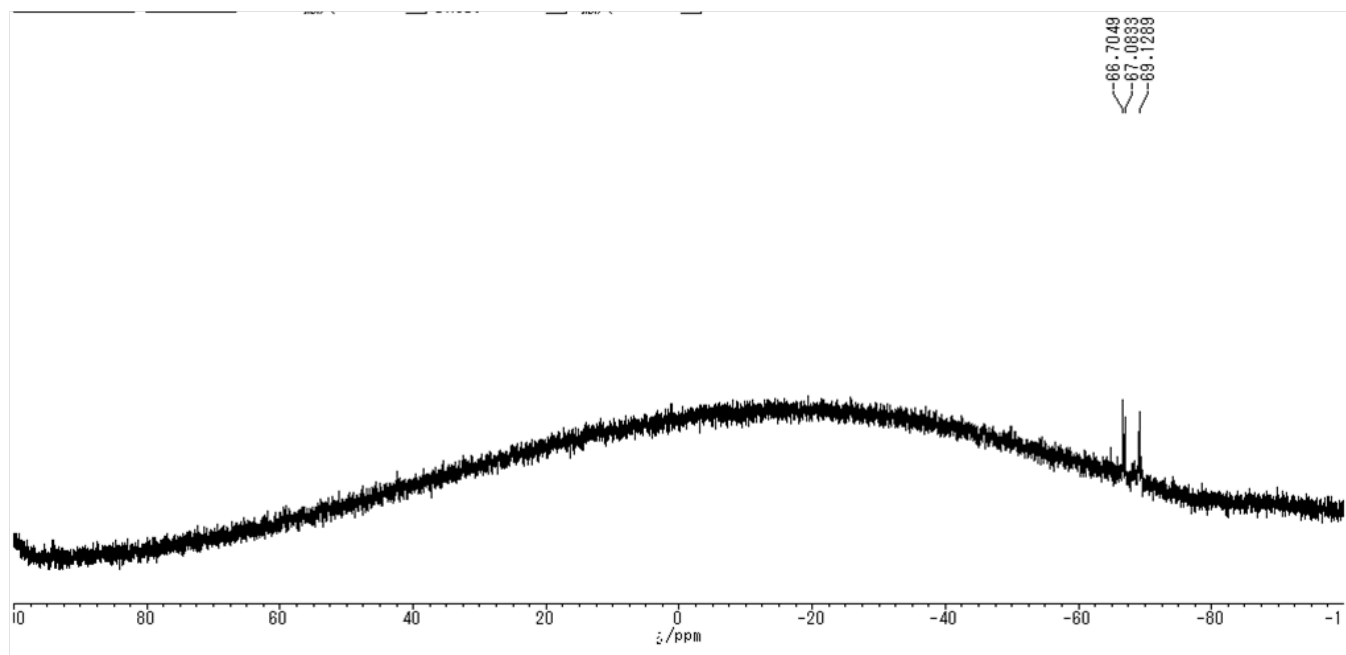

**Figure S10.**  $^{29}\text{Si}$ -NMR of POSS-DH.

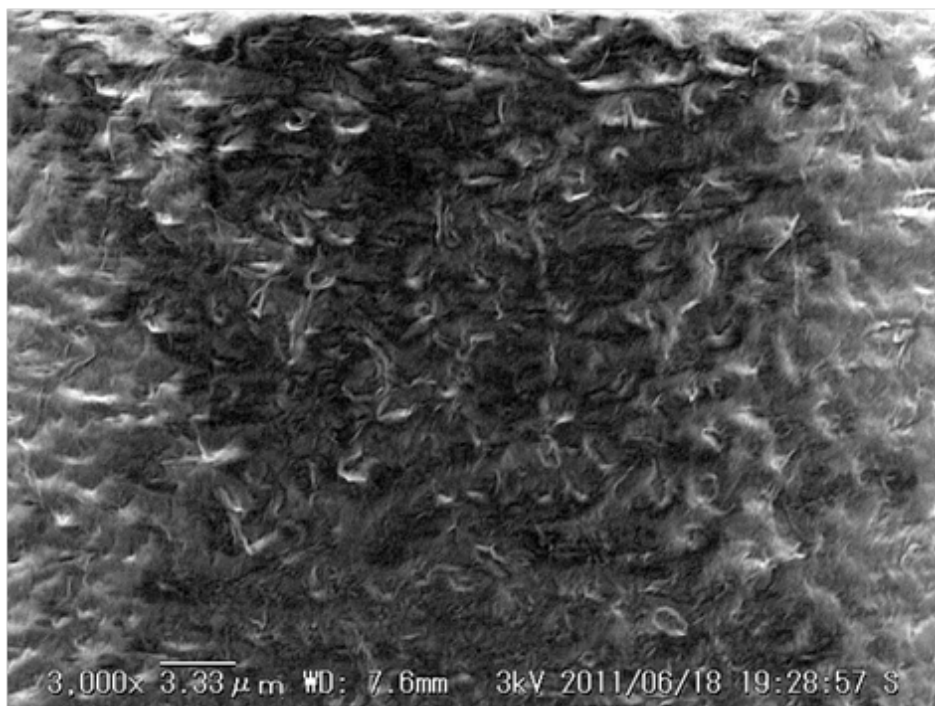

**Figure S11.** A SEM image of the surface of the opaque whitish film prepared from POSS-DE.

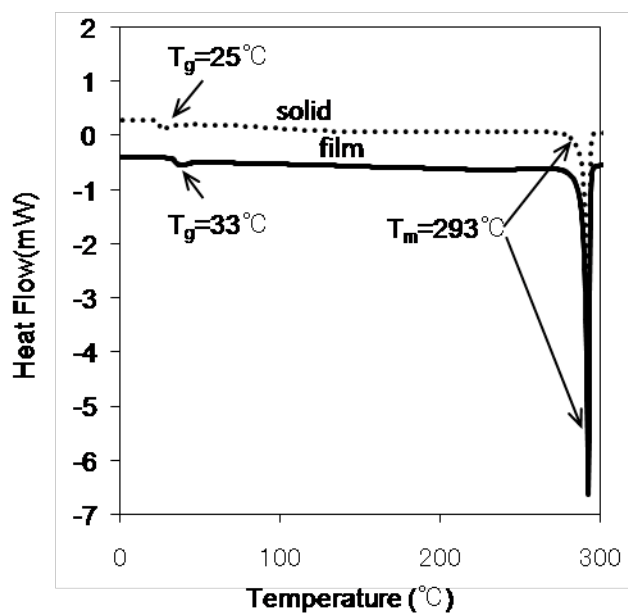

**Figure S12.** DSC traces of POSS-DE as shown in Figure 5 (solid) and the film obtained from POSS-DE (film). The film was prepared by baking the coating solution in aluminum pan for measuring DSC.
